# Supplementary material for: CD3+ and CD8+ T-Cell-Based Immune Cell Score and PD-(L)1 Expression in Pulmonary Metastases of Microsatellite Stable Colorectal Cancer
Source: MDPI journal article supplement (doi:10.3390/cancers15010206), 2022-12-29
Supplement: s1 [file s1]

## Supplementary material

**Table S1.** Spearman correlation table of the mean of CD3<sup>+</sup> and CD8<sup>+</sup> density and PD-1 and PD-L1 expression in pulmonary metastases and primary CRC

|                                         |                         | met PD1 (TC)   | met PD1 (IM)   | met PDL1 (TCe)  | met PDL1 (IC)  |
|-----------------------------------------|-------------------------|----------------|----------------|-----------------|----------------|
| Median of metastases T-cell density     | Correlation Coefficient | <b>0.631**</b> | <b>0.697**</b> | 0.061           | <b>0.405**</b> |
|                                         | Sig. (2-tailed)         | <0.001         | <0.001         | 0.627           | 0.001          |
|                                         | N                       | 67             | 63             | 67              | 66             |
|                                         |                         | prim PD1 (TC)  | prim PD1 (IM)  | prim PDL1 (TCe) | prim PDL1 (IC) |
| Median of primary tumour T-cell density | Correlation Coefficient | <b>0.449**</b> | <b>0.595**</b> | 0.221           | <b>0.361**</b> |
|                                         | Sig. (2-tailed)         | <0.001         | <0.001         | 0.096           | 0.005          |
|                                         | N                       | 59             | 59             | 58              | 58             |

\*\* . Correlation is significant at the 0.01 level (2-tailed).

\* . Correlation is significant at the 0.05 level (2-tailed).

**Table S2.** Baseline characteristics of pulmonary metastasectomy patients according to ICS of primary colorectal tumour (n=61)

|                                         | ICS 0         | ICS 1         | ICS 2         | p-value |
|-----------------------------------------|---------------|---------------|---------------|---------|
|                                         | n (%)         | n (%)         | n (%)         |         |
|                                         | 13            | 35            | 14            |         |
| <b>Sex</b>                              |               |               |               | 0.614   |
| Female                                  | 5 (38.5%)     | 18 (52.9%)    | 8 (57.1%)     |         |
| Male                                    | 8 (61.5%)     | 16 (47.1%)    | 6 (42.9%)     |         |
| <b>Age (M;SD)</b>                       | 67.2 (9.3)    | 66.9 (9.2)    | 71.7 (10.1)   | 0.368   |
| <b>CCI</b>                              |               |               |               | 0.481   |
| 1                                       | 9 (69.2%)     | 20 (58.8%)    | 8 (57.1%)     |         |
| 2                                       | 4 (30.8%)     | 7 (20.6%)     | 3 (21.4%)     |         |
| ≥3                                      | 0 (0.0%)      | 7 (20.6%)     | 3 (21.4%)     |         |
| <b>CRC stage</b>                        |               |               |               | 0.223   |
| 1-2                                     | 3 (23.1%)     | 15 (44.1%)    | 2 (14.3%)     |         |
| 3                                       | 7 (53.8%)     | 10 (29.4%)    | 8 (57.1%)     |         |
| 4                                       | 3 (23.1%)     | 9 (26.5%)     | 4 (28.6%)     |         |
| <b>CRC location</b>                     |               |               |               | 0.941   |
| Colon                                   | 7 (53.8%)     | 17 (50.0%)    | 8 (57.1%)     |         |
| Rectum                                  | 6 (46.2%)     | 17 (50.0%)    | 6 (42.9%)     |         |
| <b>Neoadjuvant CRC</b>                  |               |               |               | 0.876   |
| No                                      | 8 (61.5%)     | 23 (67.6%)    | 9 (69.2%)     |         |
| Radiotherapy                            | 1 (7.7%)      | 4 (11.8%)     | 2 (15.4%)     |         |
| Chemotherapy                            | 1 (7.7%)      | 1 (2.9%)      | 1 (7.7%)      |         |
| Radio-chemotherapy                      | 3 (23.1%)     | 6 (17.6%)     | 1 (7.7%)      |         |
| <b>DFI (d; MD; IQR)</b>                 | 750 (67-1004) | 364 (0-745)   | 193 (0-762)   | 0.222   |
| <b>Synchronicity</b>                    |               |               |               | 0.101   |
| Synchronous                             | 1 (7.7%)      | 4 (11.8%)     | 5 (35.7%)     |         |
| Metachronous                            | 12 (92.3%)    | 30 (88.2%)    | 9 (64.3%)     |         |
| <b>No of pulmonary metastases</b>       |               |               |               | 0.209   |
| 1                                       | 6 (46.2%)     | 23 (67.6%)    | 11 (78.6%)    |         |
| ≥1                                      | 7 (53.8%)     | 11 (32.4%)    | 3 (21.4%)     |         |
| <b>Size of largest PM (cm; MD; IQR)</b> | 1.5 (1.2-2.2) | 2.1 (1.2-3.5) | 3.5 (2.5-3.6) | 0.170   |
| <b>Laterality of metastasis</b>         |               |               |               | 0.256   |
| Unilateral                              | 9 (69.2%)     | 29 (85.3%)    | 13 (92.9%)    |         |
| Bilateral                               | 4 (30.8%)     | 5 (14.7%)     | 1 (7.1%)      |         |
| <b>BRAF</b>                             |               |               |               | >0.999  |

|                          |             |             |             |         |
|--------------------------|-------------|-------------|-------------|---------|
| Wild-type                | 13 (100.0%) | 31 (93.9%)  | 14 (100.0%) |         |
| Mutant                   | 0 (0.0%)    | 2 (6.1%)    | 0 (0.0%)    |         |
| <b>met PD-1 (TC)</b>     |             |             |             | 0.016   |
| Low                      | 5 (38.5%)   | 25 (73.5%)  | 5 (35.7%)   |         |
| High                     | 8 (61.5%)   | 9 (26.5%)   | 9 (64.3%)   |         |
| <b>met PD-1 (IM)</b>     |             |             |             | 0.080   |
| Low                      | 8 (61.5%)   | 19 (63.3%)  | 4 (28.6%)   |         |
| High                     | 5 (38.5%)   | 11 (36.7%)  | 10 (71.4%)  |         |
| <b>met PD-L1 (TCe)</b>   |             |             |             | 0.443   |
| Low                      | 13 (100.0%) | 34 (100.0%) | 13 (92.9%)  |         |
| High                     | 0 (0.0%)    | 0 (0.0%)    | 1 (7.1%)    |         |
| <b>met PD-L1 (IC)</b>    |             |             |             | 0.082   |
| Low                      | 4 (30.8%)   | 5 (14.7%)   | 0 (0.0%)    |         |
| High                     | 9 (69.2%)   | 29 (85.3%)  | 13 (100.0%) |         |
| <b>prim PD-1 (TC)</b>    |             |             |             | 0.031*  |
| Low                      | 9 (69.2%)   | 19 (55.9%)  | 3 (21.4%)   |         |
| High                     | 4 (30.8%)   | 15 (44.1%)  | 11 (78.6%)  |         |
| <b>prim PD-1 (IM)</b>    |             |             |             | <0.001* |
| Low                      | 12 (92.3%)  | 17 (51.5%)  | 2 (14.3%)   |         |
| High                     | 1 (7.7%)    | 16 (48.5%)  | 12 (85.7%)  |         |
| <b>prim PD-L1 (TCe)</b>  |             |             |             | 0.702   |
| Low                      | 13 (100.0%) | 32 (97.0%)  | 13 (92.9%)  |         |
| High                     | 0 (0.0%)    | 1 (3.0%)    | 1 (7.1%)    |         |
| <b>prim PD-L1 (IC)</b>   |             |             |             | 0.002*  |
| Low                      | 12 (92.3%)  | 26 (78.8%)  | 5 (35.7%)   |         |
| High                     | 1 (7.7%)    | 7 (21.2%)   | 9 (64.3%)   |         |
| <b>ICS of metastases</b> |             |             |             | 0.074   |
| Low                      | 4 (30.8%)   | 5 (14.7%)   | 0 (0.0%)    |         |
| Intermediate             | 5 (38.5%)   | 23 (67.6%)  | 8 (57.1%)   |         |
| High                     | 4 (30.8%)   | 6 (17.6%)   | 6 (42.9%)   |         |

\*Statistically significant at the 0.05 level

**Table S3.** Spearman correlation table of CD3+ and CD8+ densities between primary tumour and first pulmonary metastases.

|                                  |                         | <b>met CD3<sup>+</sup> (TC)</b> | <b>met CD3<sup>+</sup> (IM)</b> | <b>met CD8<sup>+</sup> (TC)</b> | <b>met CD8<sup>+</sup> (IM)</b> |
|----------------------------------|-------------------------|---------------------------------|---------------------------------|---------------------------------|---------------------------------|
| <b>met CD3<sup>+</sup> (TC)</b>  | Correlation Coefficient | 1.000                           | <b>0.670**</b>                  | <b>0.856**</b>                  | <b>0.654**</b>                  |
|                                  | Sig. (2-tailed)         |                                 | <0.001                          | <0.001                          | <0.001                          |
|                                  | N                       | 67                              | 65                              | 67                              | 65                              |
| <b>met CD3<sup>+</sup> (IM)</b>  | Correlation Coefficient | <b>,670**</b>                   | 1.000                           | <b>,613**</b>                   | <b>,798**</b>                   |
|                                  | Sig. (2-tailed)         | <0.001                          |                                 | <0.001                          | <0.001                          |
|                                  | N                       | 65                              | 65                              | 65                              | 65                              |
| <b>met CD8<sup>+</sup> (TC)</b>  | Correlation Coefficient | <b>,856**</b>                   | <b>,613**</b>                   | 1.000                           | <b>,774**</b>                   |
|                                  | Sig. (2-tailed)         | <0.001                          | <0.001                          |                                 | <0.001                          |
|                                  | N                       | 67                              | 65                              | 67                              | 65                              |
| <b>met CD8<sup>+</sup> (IM)</b>  | Correlation Coefficient | <b>,654**</b>                   | <b>,798**</b>                   | <b>,774**</b>                   | 1.000                           |
|                                  | Sig. (2-tailed)         | <0.001                          | <0.001                          | <0.001                          |                                 |
|                                  | N                       | 65                              | 65                              | 65                              | 65                              |
| <b>prim CD3<sup>+</sup> (TC)</b> | Correlation Coefficient | 0.004                           | 0.189                           | 0.103                           | <b>.290*</b>                    |
|                                  | Sig. (2-tailed)         | 0.977                           | 0.153                           | 0.428                           | 0.026                           |
|                                  | N                       | 61                              | 59                              | 61                              | 59                              |
| <b>prim CD3<sup>+</sup> (IM)</b> | Correlation Coefficient | 0.061                           | 0.209                           | 0.162                           | 0.192                           |
|                                  | Sig. (2-tailed)         | 0.644                           | 0.115                           | 0.218                           | 0.149                           |
|                                  | N                       | 60                              | 58                              | 60                              | 58                              |
| <b>prim CD8<sup>+</sup> (TC)</b> | Correlation Coefficient | 0.234                           | 0.229                           | <b>0.259*</b>                   | <b>0.350**</b>                  |
|                                  | Sig. (2-tailed)         | 0.070                           | 0.081                           | 0.044                           | 0.007                           |
|                                  | N                       | 61                              | 59                              | 61                              | 59                              |
| <b>prim CD8<sup>+</sup> (IM)</b> | Correlation Coefficient | <b>0.354**</b>                  | <b>0.350**</b>                  | <b>0.362**</b>                  | <b>0.406**</b>                  |
|                                  | Sig. (2-tailed)         | 0.006                           | 0.008                           | 0.005                           | 0.002                           |

|  |   |    |    |    |    |
|--|---|----|----|----|----|
|  | N | 59 | 57 | 59 | 57 |
|--|---|----|----|----|----|

\*\*, Correlation is significant at the 0.01 level (2-tailed).

\*, Correlation is significant at the 0.05 level (2-tailed).

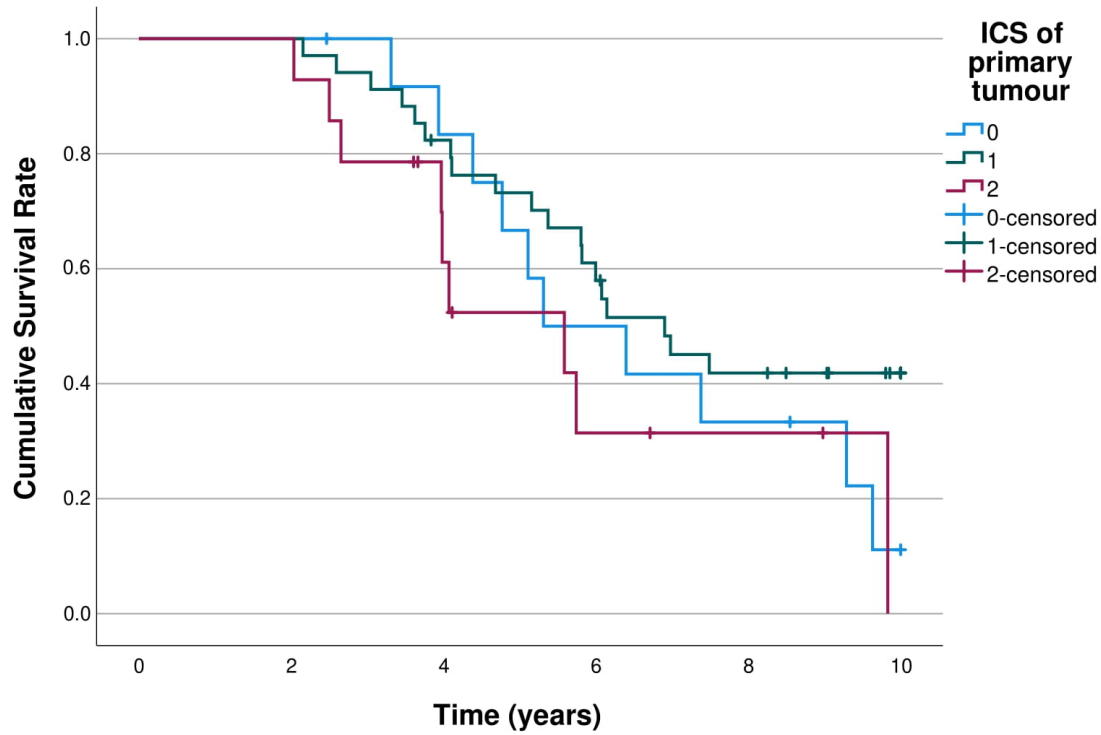

**Figure S1.** K-M curves of 10-year survival stratified by the ICS of the primary tumour. Log rank  $p=0.152$ .

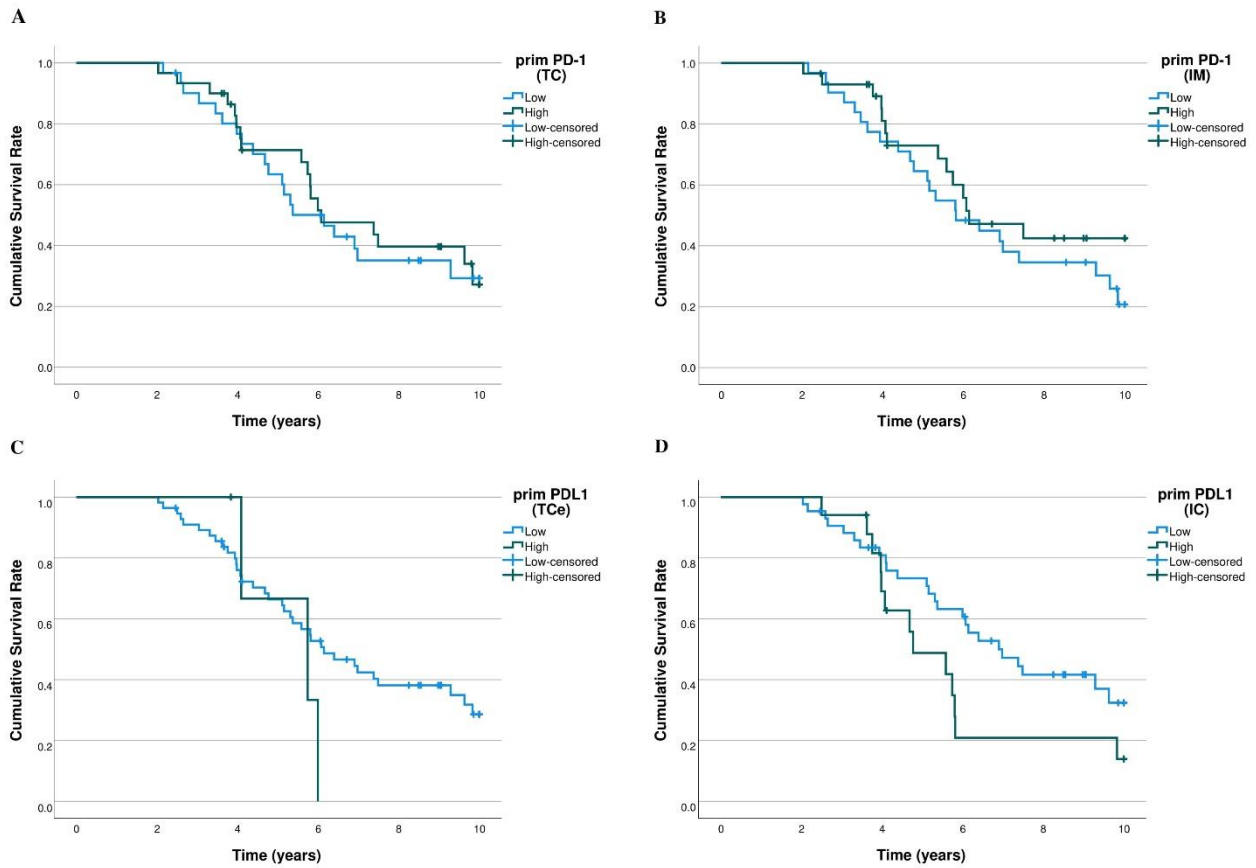

**Figure S2.** K-M 10-year overall survival curves of PD-1/PD-L1 expression of the primary tumour. **(A)** PD-1 expression (low vs. high) in the tumour centre ( $p=0.726$ ). **(B)** PD-1 expression (low vs. high) in the invasive margin ( $p=0.328$ ). **(C)** PD-L1 expression (low vs. high) in the tumour cells ( $p=0.504$ ). **(D)** PD-L1 expression (low vs. high) in the tumour infiltrating immune cells ( $p=0.086$ ).

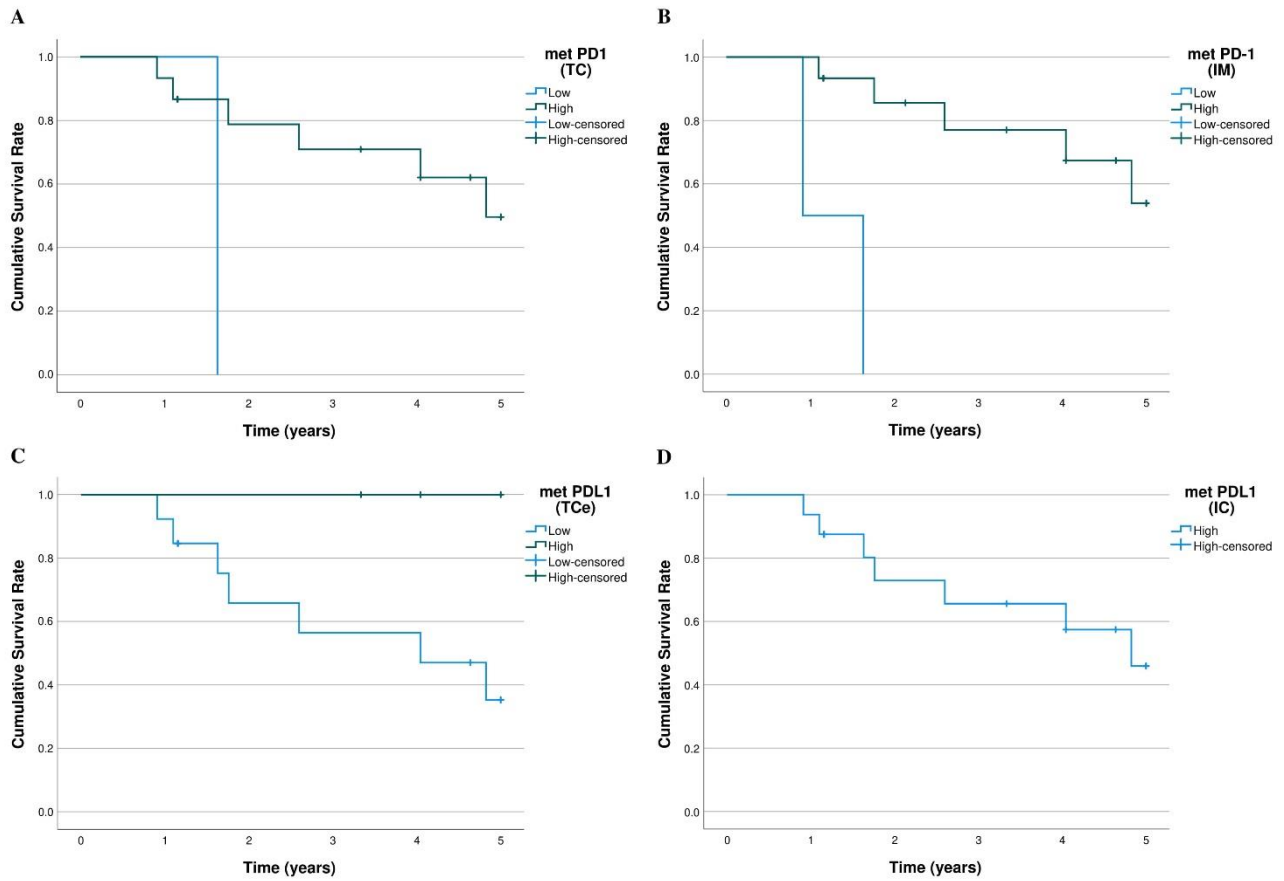

**Figure S3.** The K-M curves of 5-year overall survival of pulmonary metastasectomy in ICS-high pulmonary metastases (n=17) stratified by **(A)** PD-1 in the tumour centre ( $p=0.076$ ), **(B)** PD-1 in the invasive margin ( $p<0.001$ ), **(C)** PD-L1 in the tumour cells ( $p=0.138$ ) and, **(D)** PD-L1 in the immune cells. Log rank tests were applied.

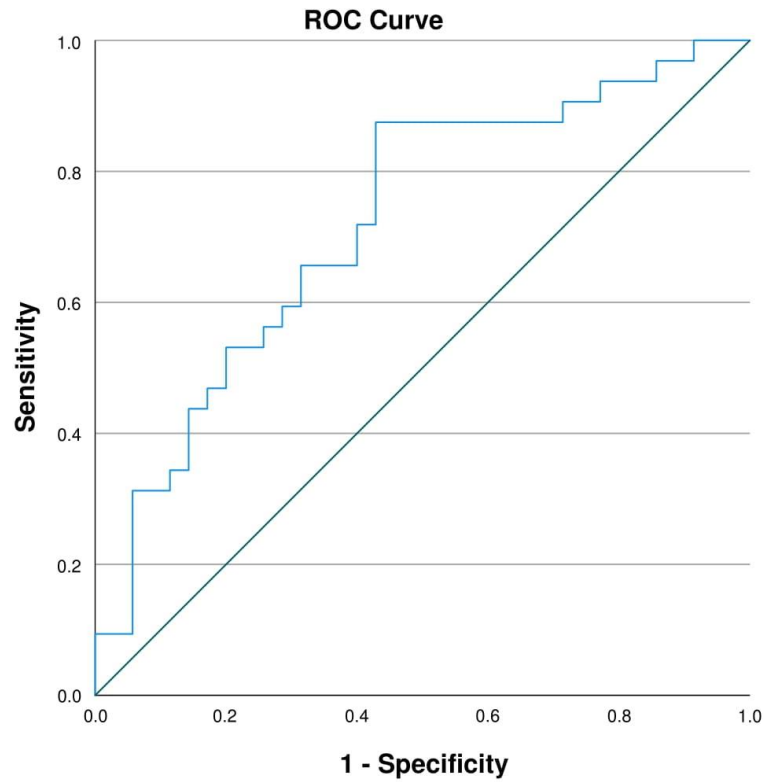

**Figure S4.** Receiver operating characteristics (ROC) curve of the mean percentile score of the immune cell densities in the invasive margin and tumour centre of the pulmonary metastases.

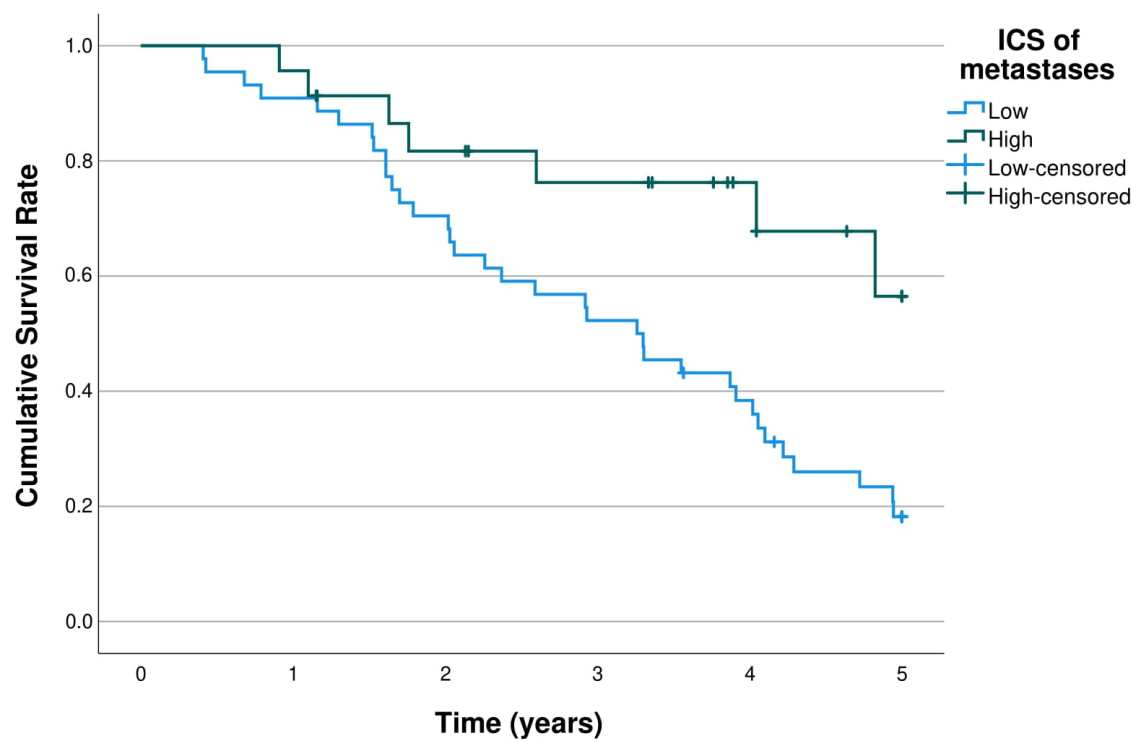

**Figure S5.** The K-M curves of 5-year overall survival stratified by the ICS of pulmonary metastases according to the cut-off value (65%) selected from ROC-curve (n=67). Log rank  $p=0.009$ .
